# Supplementary material for: Candida auris Whole-Genome Sequence Benchmark Dataset for Phylogenomic Pipelines
Source: J Fungi (Basel). 2021 Mar 16;7(3):214. doi: 10.3390/jof7030214 (PMC8002225; doi:10.3390/jof7030214)
Supplement: Supplementary file 1 [file jof-07-00214-s001.pdf]

## Supplementary File

**Supplementary Figure 1.** Phylogeny of *Candida auris* benchmark dataset including cases from Clade I. The internal solid circle nodes indicate separations with a bootstrap value of at least 90%, and the number above the branch indicate branch length. Each leaf node represents a unique isolate; the shape of the node refers to the outbreak number code and the node color refers to the facility.

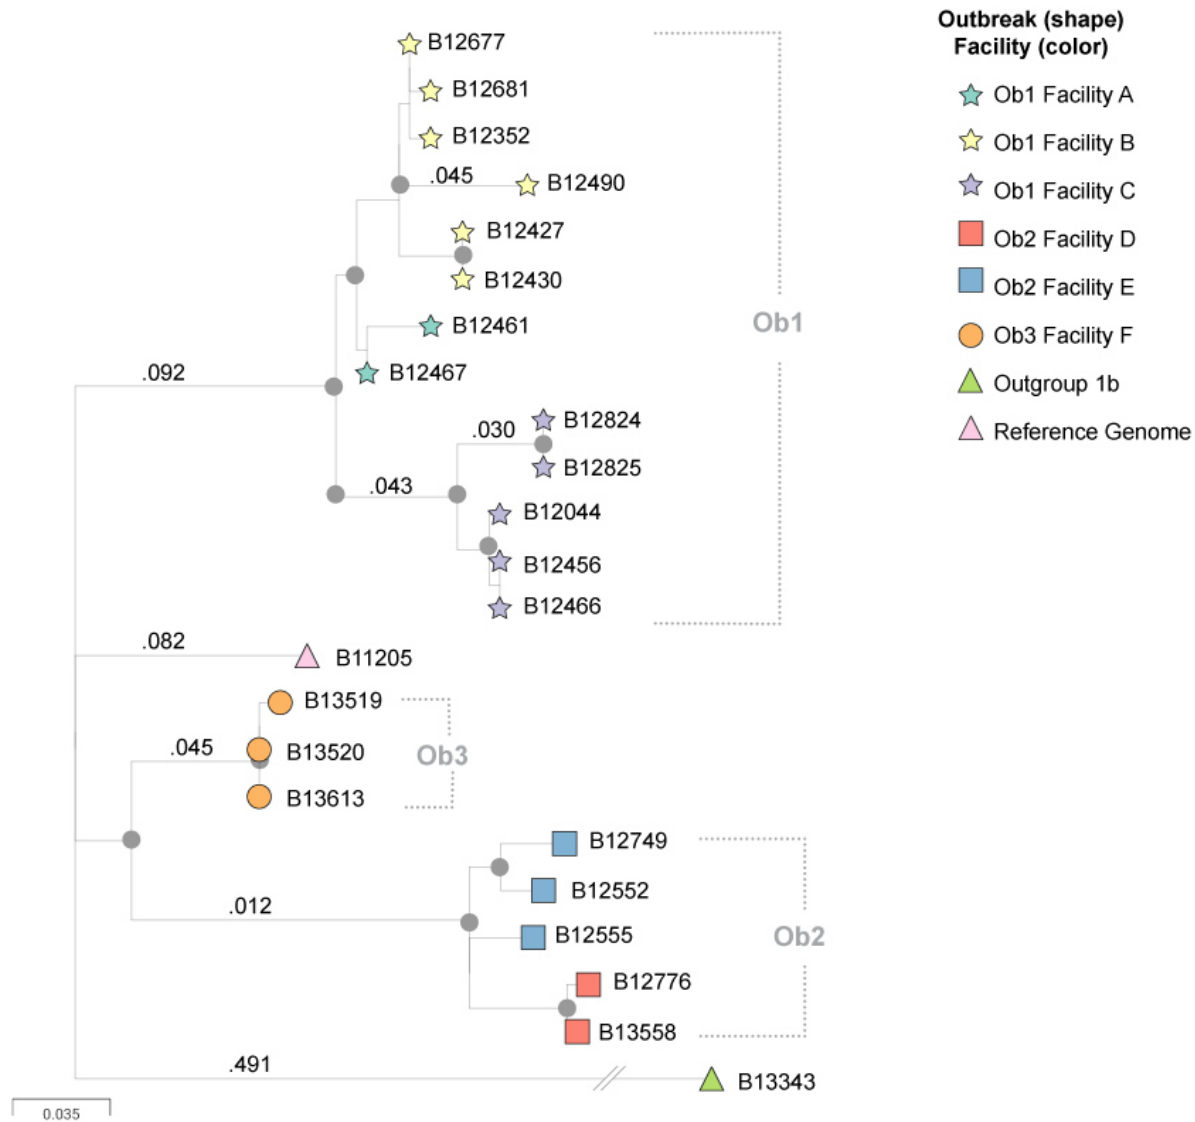

**Figure 1.** Phylogeny of *Candida auris* benchmark dataset including cases from Clade I. The internal solid circle nodes indicate separations with a bootstrap value of at least 90%, and the number above the branch indicate branch length. Each leaf node represents a unique isolate; the shape of the node refers to the outbreak number code and the node color refers to the facility.

- Outbreak (shape)**  
**Facility (color)**
- Ob1 Facility A
  - Ob1 Facility B
  - Ob1 Facility C
  - Ob2 Facility D
  - Ob2 Facility E
  - Ob3 Facility F
  - Outgroup 1b
  - Reference Genome

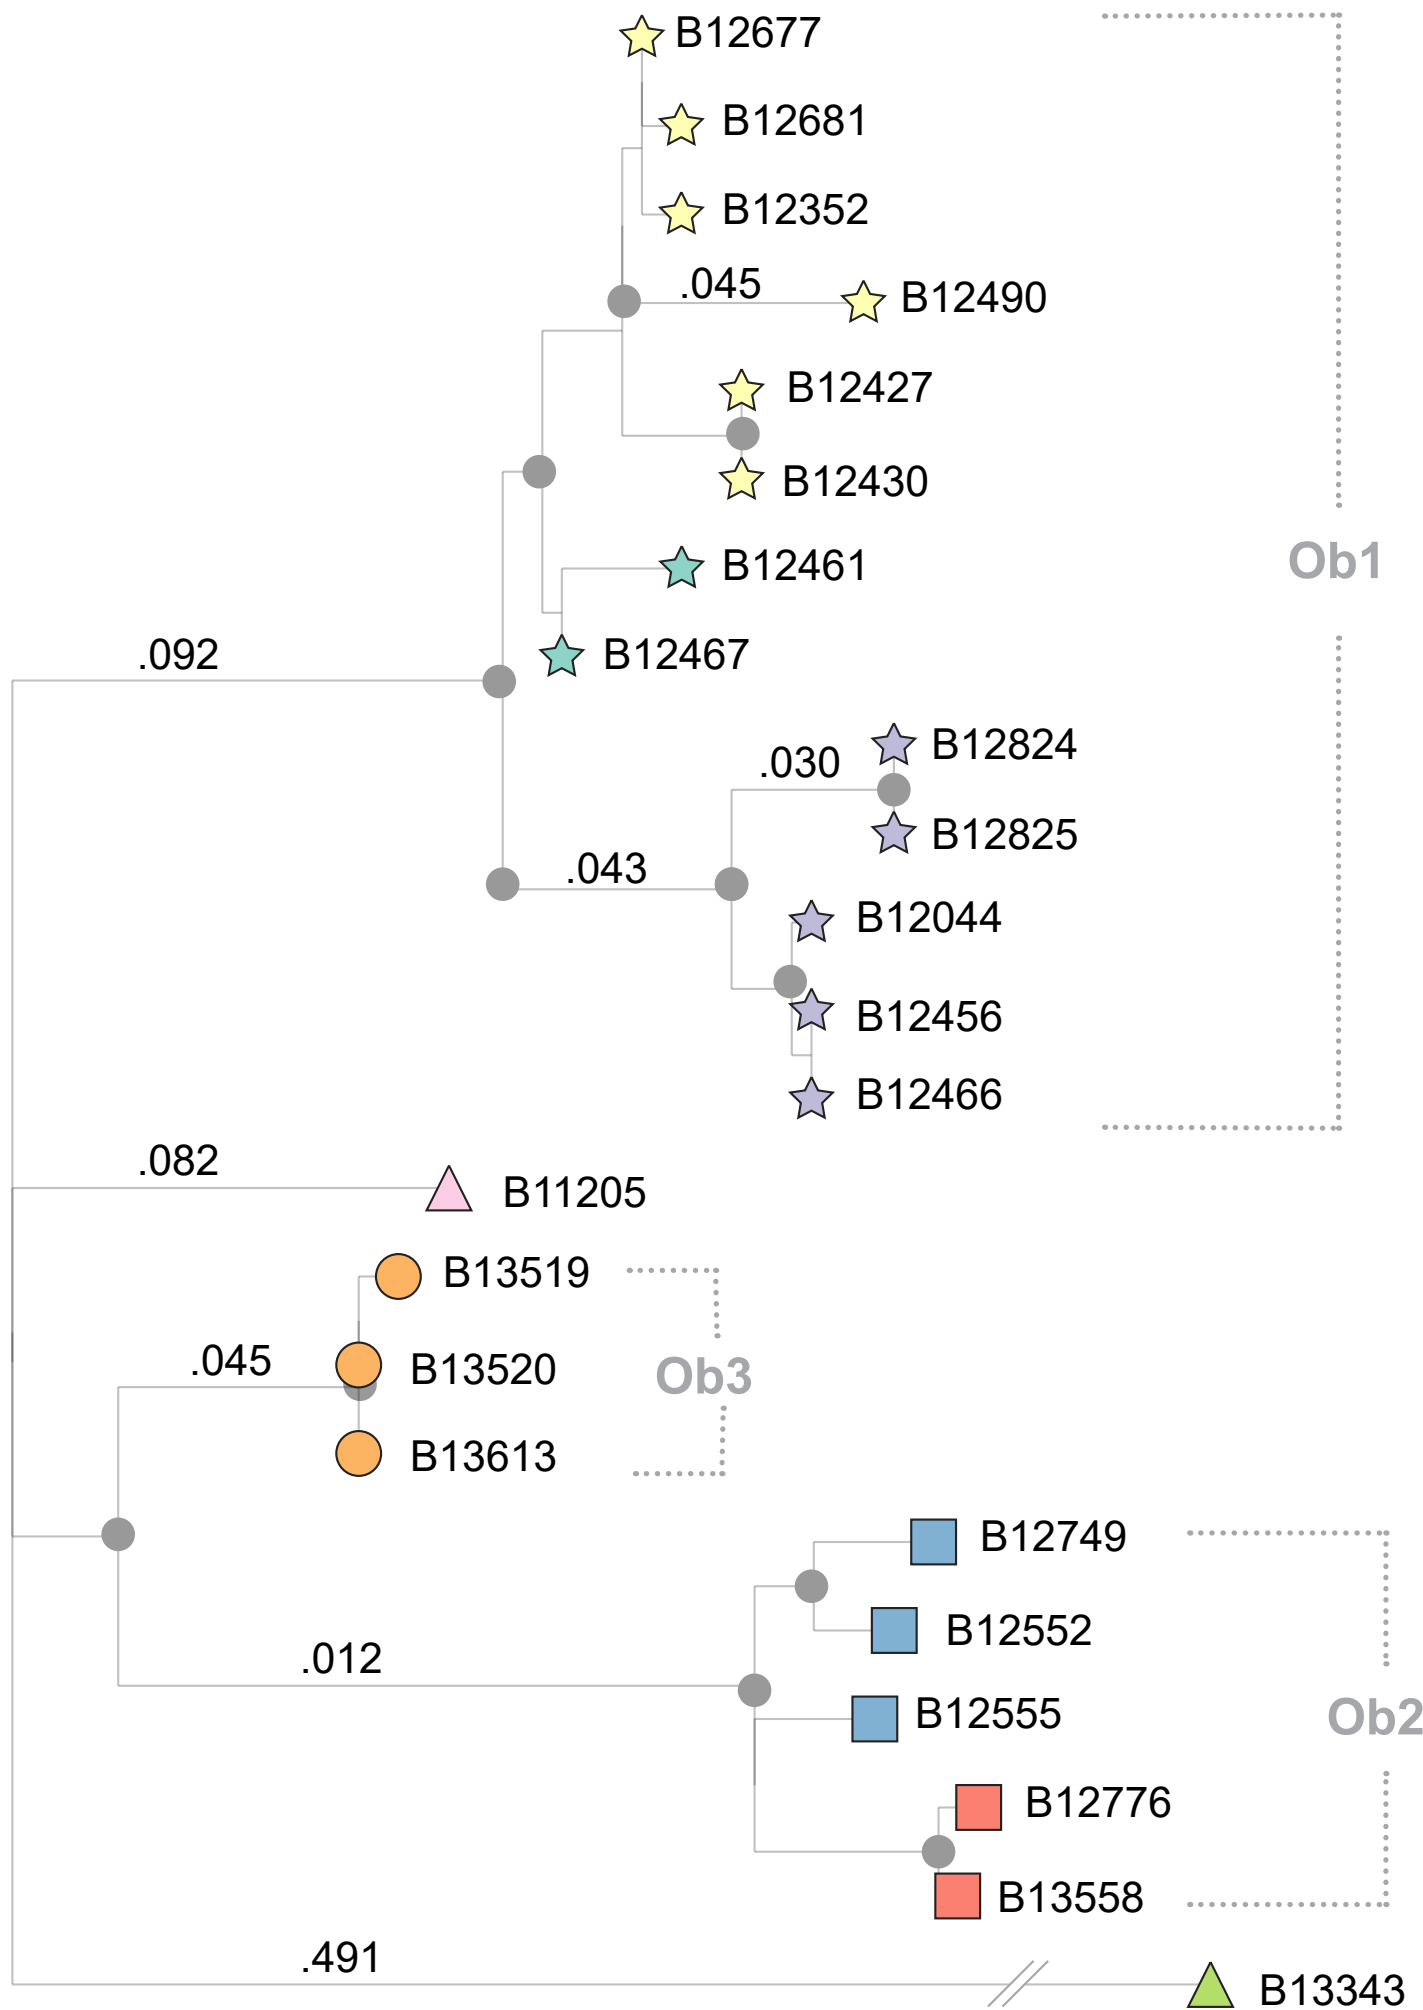

0.035
